# Supplementary material for: Oxidation-reduction potential as a new marker for oxidative stress: Correlation to male infertility
Source: PubMed Central journal article supplement — Investig Clin Urol. 2017 Nov 2;58(6):385–99. doi: 10.4111/icu.2017.58.6.385 (PMC5671957; doi:10.4111/icu.2017.58.6.385), 2017-11-02
Supplement: icu-58-385-s001.pdf [file icu-58-385-s001.pdf]

**Supplementary Table 1.** Summary of the commonly used techniques to evaluate seminal oxidative stress

| Technique                | Instrument                                             | Advantages                                                                                                                                                                                                                                          | Disadvantages                                                                                                                                                                              |
|--------------------------|--------------------------------------------------------|-----------------------------------------------------------------------------------------------------------------------------------------------------------------------------------------------------------------------------------------------------|--------------------------------------------------------------------------------------------------------------------------------------------------------------------------------------------|
| ORP                      | MiOXSYS                                                | Provides a snapshot of the redox balance in real time<br>Levels of all oxidants and reductants are measured<br>Less time consuming<br>Inexpensive materials<br>Simple methodology<br>Both fresh and frozen semen and seminal plasma can be measured | Semen age, high viscosity, and repeated centrifugation may alter results of measurements                                                                                                   |
| ROS by chemiluminescence | Luminometer                                            | Robust chemiluminescence<br>High sensitivity and specificity<br>Intracellular and extracellular ROS are detected                                                                                                                                    | 15–30 minutes to yield test results<br>Cost and size of equipment<br>Semen age, volume, repeated centrifugation, temperature and background luminescence may alter results of measurements |
| TAC                      | Colorimeter<br>Luminometer                             | Reliable and predictive of antioxidant capacity<br>Total antioxidants in seminal plasma measured                                                                                                                                                    | Cannot differentiate the amounts of enzymatic and nonenzymatic antioxidants independently<br>Long duration of inhibition time<br>Cost of microplate readers                                |
| ROS-TAC                  | Statistical analyses                                   | Superior to ROS or TAC alone                                                                                                                                                                                                                        | Calculated through statistical analyses<br>Does not directly measure ROS or TAC                                                                                                            |
| MDA                      | Colorimeter and fluorometer for MDA-TBA adduct<br>HPLC | Assesses lipid peroxidation                                                                                                                                                                                                                         | Rigorous controls required<br>Nonspecific test<br>Only detects <i>post hoc</i> damage                                                                                                      |

ORP, oxidation-reduction potential; ROS, reactive oxygen species; TAC, total antioxidant capacity; MDA, malondialdehyde; TBA, thiobarbituric acid; HPLC, high performance liquid chromatography.

Adapted from Agarwal et al. Ther Adv Urol 2016;8:302-318 [22].
