# Supplementary material for: Oxidation-reduction potential as a new marker for oxidative stress: Correlation to male infertility
Source: PubMed Central journal article supplement — Investig Clin Urol. 2017 Nov 2;58(6):385–99. doi: 10.4111/icu.2017.58.6.385 (PMC5671957; doi:10.4111/icu.2017.58.6.385), 2017-11-02
Supplement: icu-58-385-s002.pdf [file icu-58-385-s002.pdf]

**Supplementary Table 2.** Semen parameters and oxidation-reduction potential (ORP) changes in all patients (n=28) who had repeated tests done over a period of 16.8±7.7 weeks

| Variable                                 | 1st sample        | 2nd sample         | p-value |
|------------------------------------------|-------------------|--------------------|---------|
| Concentration (10 <sup>6</sup> sperm/mL) | 7.2 (2.93–20.73)  | 10.55 (5.22–33.3)  | 0.019   |
| Total motility (%)                       | 32 (17.5–47.5)    | 42.5 (29.25–53.75) | 0.008   |
| Morphology (normal form %)               | 2 (1–5.5)         | 2 (1.25–4.75)      | 0.57    |
| ORP (mV/10 <sup>6</sup> sperm/mL)        | 6.08 (2.63–15.92) | 2.06 (0.7–9.16)    | 0.007   |
| Patients treated with doxycycline (n=9)  |                   |                    |         |
| Endtz (M/mL)                             | 0.8 (0.4–2.3)     | 0 (0–0.4)          | 0.024   |
| ORP (mV/10 <sup>6</sup> sperm/mL)        | 0.77 (0.49–1.05)  | 0.62 (0.49–0.74)   | 0.086   |

Values are presented as median (interquartile range).

Adapted from Agarwal et al. *Urology* 2017;104:84-9 [55], permission of Elsevier.
