# Supplementary material for: Oxidation-reduction potential as a new marker for oxidative stress: Correlation to male infertility
Source: PubMed Central journal article supplement — Investig Clin Urol. 2017 Nov 2;58(6):385–99. doi: 10.4111/icu.2017.58.6.385 (PMC5671957; doi:10.4111/icu.2017.58.6.385), 2017-11-02
Supplement: icu-58-385-s004.pdf [file icu-58-385-s004.pdf]

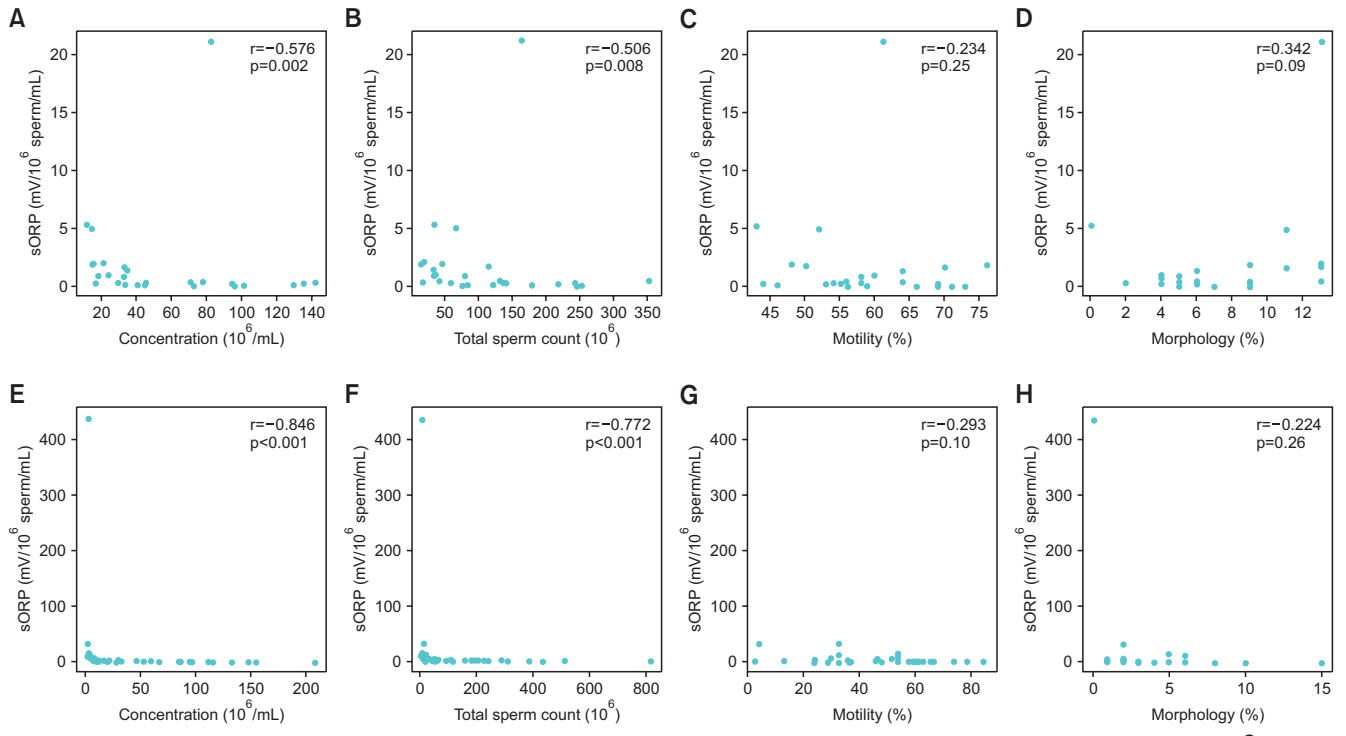

©CCF 2016

**Supplementary Fig. 2.** Correlation of seminal plasma static oxidation-reduction potential (sORP) (mV/10<sup>6</sup> sperm/mL) with semen parameters at 0 minutes in healthy controls (A, concentration; B, total sperm count; C, motility; D, morphology) and infertile patients (E, concentration; F, total sperm count; G, motility; H, morphology). Reprinted with permission, Cleveland Clinic Center for Medical Art & Photography ©2013-2017.
