# Supplementary material for: Oxidation-reduction potential as a new marker for oxidative stress: Correlation to male infertility
Source: PubMed Central journal article supplement — Investig Clin Urol. 2017 Nov 2;58(6):385–99. doi: 10.4111/icu.2017.58.6.385 (PMC5671957; doi:10.4111/icu.2017.58.6.385), 2017-11-02
Supplement: icu-58-385-s007.pdf [file icu-58-385-s007.pdf]

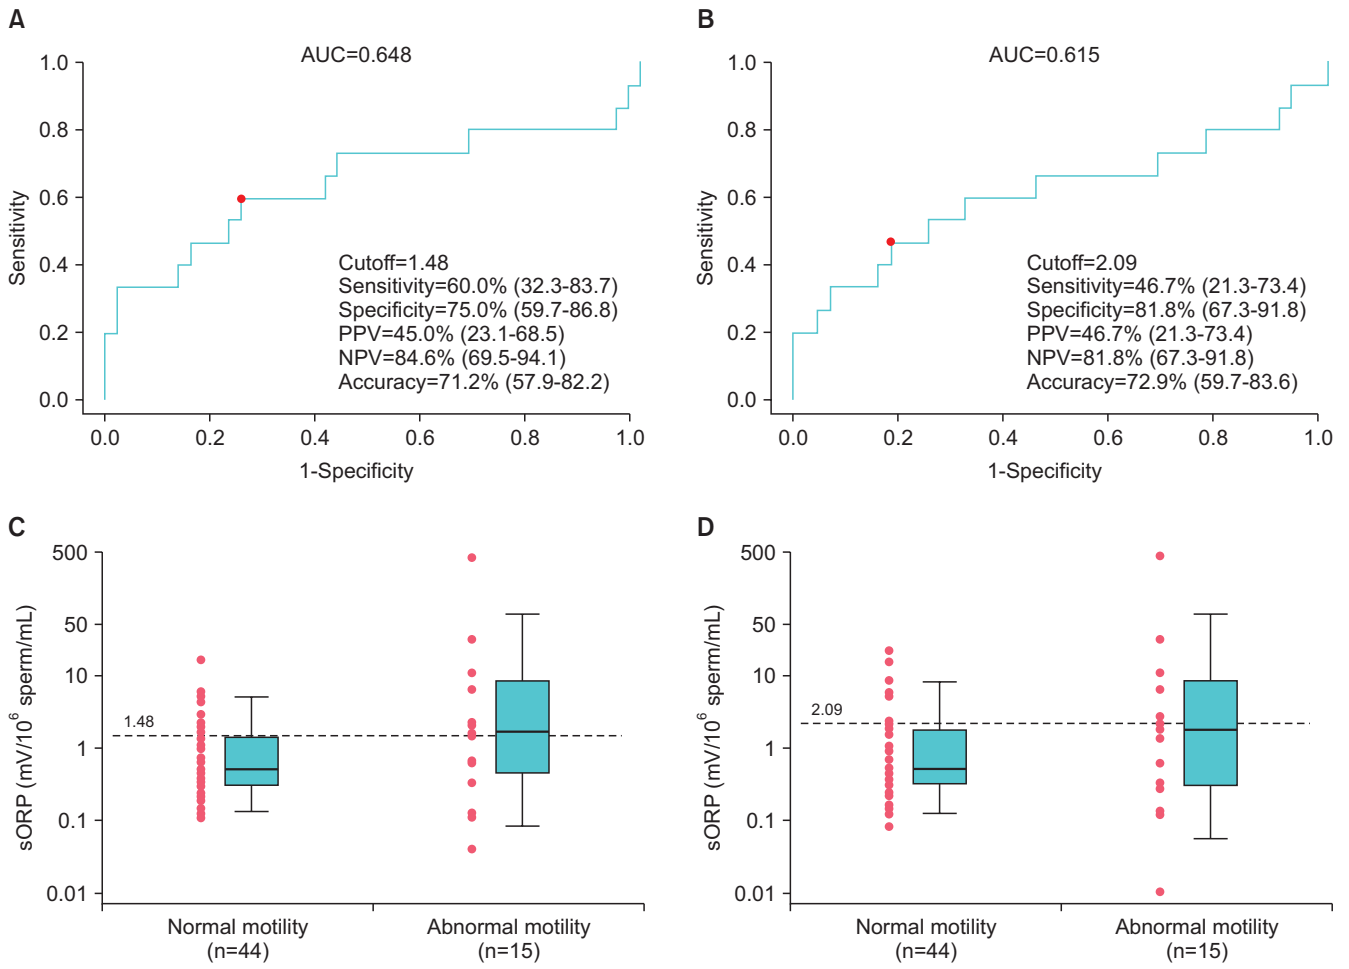

©CCF 2016

**Supplementary Fig. 5.** Receiver operating characteristic curve establishing the cutoff in semen (A) and seminal plasma (B). Distribution of static oxidation-reduction potential (sORP) (mV/10<sup>6</sup> sperm/mL) in subjects with normal and abnormal motility in semen (C) and seminal plasma (D), suggesting a criterion for sORP in distinguishing semen quality based on good ( $\geq 40\%$ ) and poor ( $\leq 40\%$ ) motility. AUC, area under the curve; NPV, negative predictive value; PPV, positive predictive value. Reprinted with permission, Cleveland Clinic Center for Medical Art & Photography ©2013-2017.
