# Supplementary material for: Oxidation-reduction potential as a new marker for oxidative stress: Correlation to male infertility
Source: PubMed Central journal article supplement — Investig Clin Urol. 2017 Nov 2;58(6):385–99. doi: 10.4111/icu.2017.58.6.385 (PMC5671957; doi:10.4111/icu.2017.58.6.385), 2017-11-02
Supplement: icu-58-385-s008.pdf [file icu-58-385-s008.pdf]

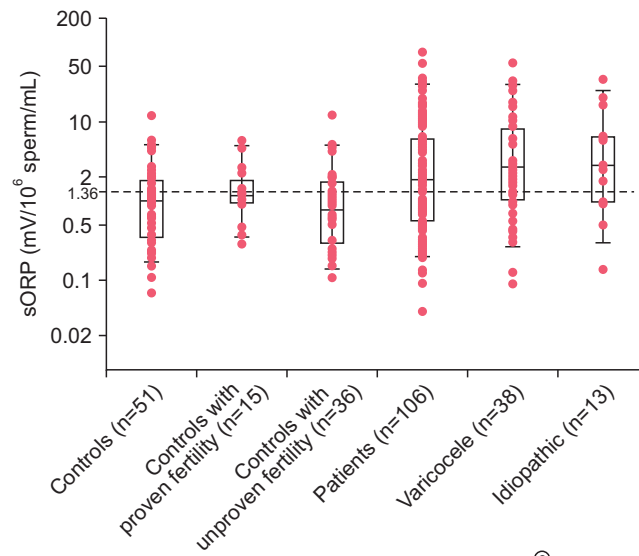

©CCF 2016

**Supplementary Fig. 6.** Distribution of static oxidation-reduction potential (sORP) (mV/10<sup>6</sup> sperm/mL) in (1) normal healthy controls; (2) controls with proven fertility; (3) controls with unproven fertility; (4) infertile patients; (5) infertile patients presenting with a clinical varicocele; and (6) those with idiopathic infertility. Reprinted with permission, Cleveland Clinic Center for Medical Art & Photography ©2013-2017.
