# Supplementary material for: Oxidation-reduction potential as a new marker for oxidative stress: Correlation to male infertility
Source: PubMed Central journal article supplement — Investig Clin Urol. 2017 Nov 2;58(6):385–99. doi: 10.4111/icu.2017.58.6.385 (PMC5671957; doi:10.4111/icu.2017.58.6.385), 2017-11-02
Supplement: icu-58-385-s009.pdf [file icu-58-385-s009.pdf]

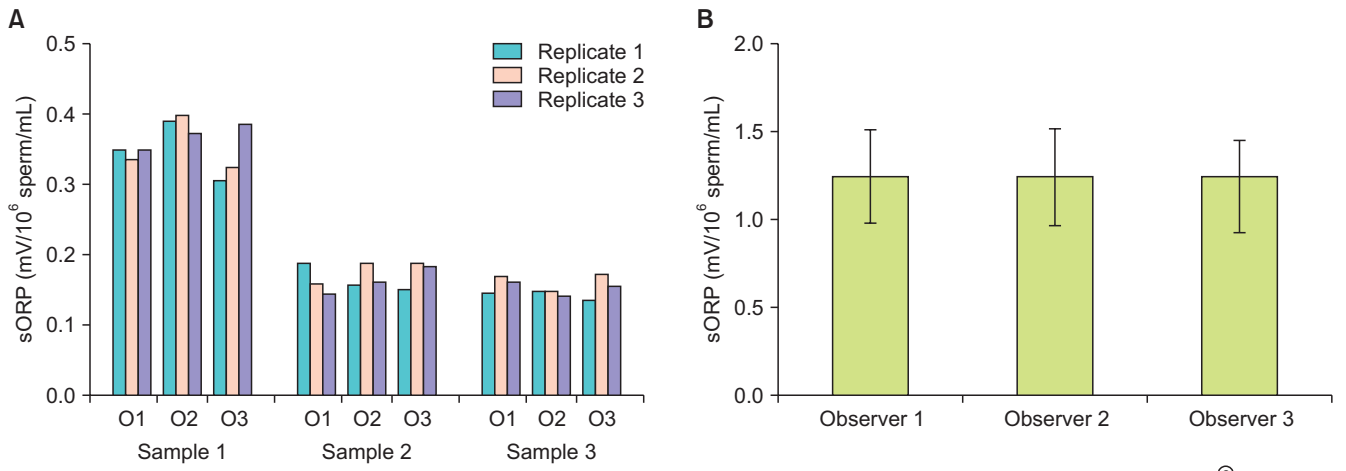

©CCF 2016

**Supplementary Fig. 7.** Static oxidation-reduction potential (sORP) (mV/10<sup>6</sup> sperm/mL) across samples and observers showing (A) Intraobserver reliability by observing the replicate sORP measures for each of the three samples. Most replicates were similar to each other and across the 3 observers (O1–O3). (B) Interobserver reliability by comparing sORP-values across observers. The mean sORP for each observer was equivalent with similar standard error of the mean, suggesting that all observers obtained similar sORP-values for each of the 10 samples tested, which were measured in 4 replicates. Reprinted with permission, Cleveland Clinic Center for Medical Art & Photography ©2013-2017.
