# Supplementary material for: Oxidation-reduction potential as a new marker for oxidative stress: Correlation to male infertility
Source: PubMed Central journal article supplement — Investig Clin Urol. 2017 Nov 2;58(6):385–99. doi: 10.4111/icu.2017.58.6.385 (PMC5671957; doi:10.4111/icu.2017.58.6.385), 2017-11-02
Supplement: icu-58-385-s010.pdf [file icu-58-385-s010.pdf]

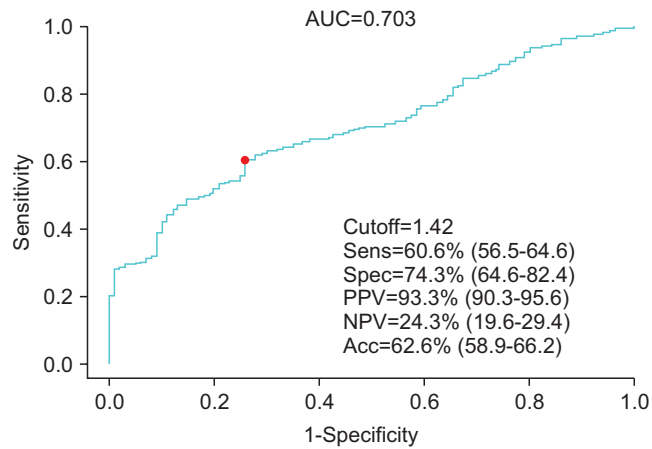

©CCF 2017

**Supplementary Fig. 8.** Receiver operating characteristic curve of oxidation-reduction potential (ORP) (mv/10<sup>6</sup> sperm/mL) in distinguishing infertile patients from healthy controls in the combined dataset (Cleveland Clinic and Doha, Qatar). Acc, accuracy; AUC, area under the curve; NPV, negative predictive value; PPV, positive predictive value; Sens, sensitivity; Spec, specificity. Reprinted with permission, Cleveland Clinic Center for Medical Art & Photography ©2013-2017.
